# Supplementary figures and images for: Precise Dose of Folic Acid Supplementation Is Essential for Embryonic Heart Development in Zebrafish
Source: MDPI journal article supplement (doi:10.3390/biology11010028), 2021-12-26

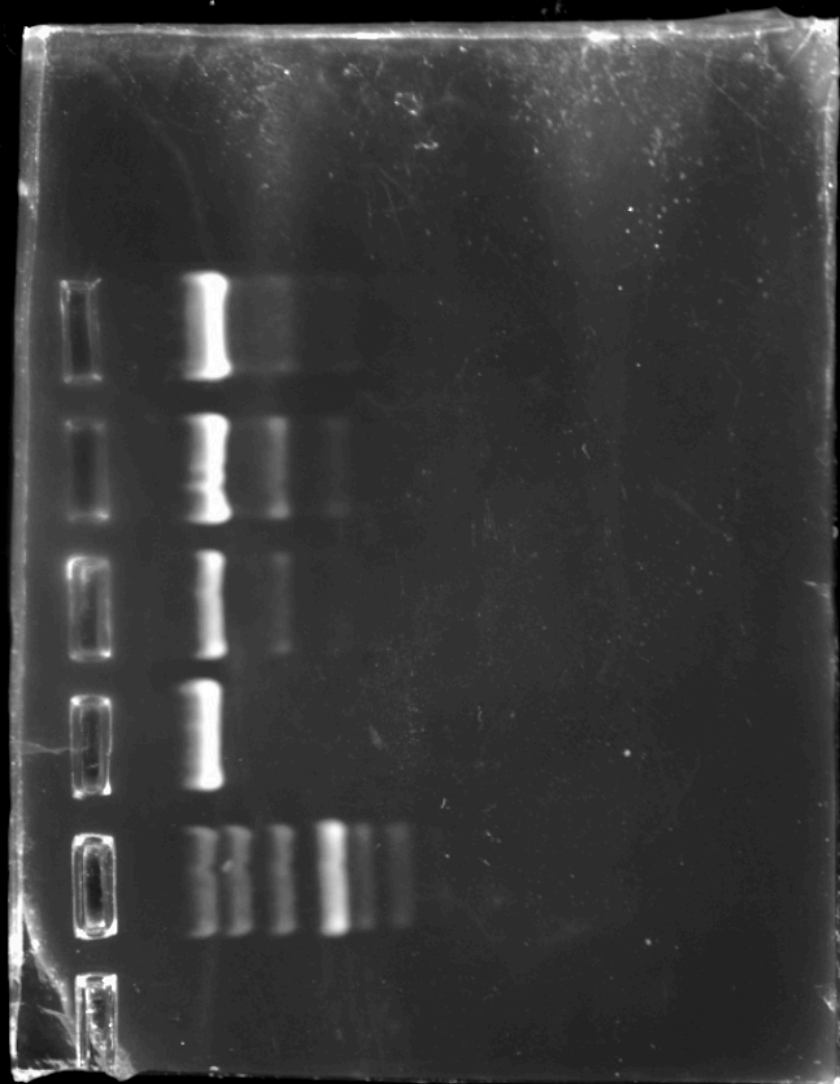

Supplement: s1 [file s1]
